# Supplementary material for: Impacts of heterogeneous uptake of dinitrogen pentoxide and chlorine activation on ozone and reactive nitrogen partitioning: improvement and application of the WRF-Chem model in southern China
Source: Copernicus journal article supplement (doi:10.5194/acp-16-14875-2016), 2016-12-01
Supplement: Supplementary file 1 [file acp-16-14875-2016-supplement.pdf]

Supplement of Atmos. Chem. Phys., 16, 14875–14890, 2016  
<http://www.atmos-chem-phys.net/16/14875/2016/>  
doi:10.5194/acp-16-14875-2016-supplement  
© Author(s) 2016. CC Attribution 3.0 License.

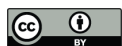

Atmospheric  
Chemistry  
and Physics  
Open Access  
EGU

*Supplement of*

## **Impacts of heterogeneous uptake of dinitrogen pentoxide and chlorine activation on ozone and reactive nitrogen partitioning: improvement and application of the WRF-Chem model in southern China**

**Qinyi Li et al.**

*Correspondence to:* T. Wang (cetwang@polyu.edu.hk)

The copyright of individual parts of the supplement might differ from the CC-BY 3.0 licence.

**Table S1. Mass fraction of elements in sea salt and dust**

|    | In sea salt | In dust |
|----|-------------|---------|
| Na | 0.307       | 0.024   |
| Cl | 0.550       | -       |
| Ca | 0.012       | 0.039   |
| K  | 0.011       | 0.021   |
| Mg | 0.036       | 0.022   |

**Table S2. The Cl initiated gaseous chemistry for RACM ESRL mechanism.**

| No.  | Reactions                                                                                             | Rate                                                            |
|------|-------------------------------------------------------------------------------------------------------|-----------------------------------------------------------------|
| RS01 | Cl <sub>2</sub> +hv=2.0 Cl                                                                            | Photolysis rate of Cl <sub>2</sub>                              |
| RS02 | HOCl+hv=HO+Cl                                                                                         | Photolysis rate of HOCl                                         |
| RS03 | ClNO <sub>2</sub> +hv=Cl+NO <sub>2</sub>                                                              | Photolysis rate of ClNO <sub>2</sub>                            |
| RS04 | FMCl+hv=Cl+CO+HO <sub>2</sub>                                                                         | Photolysis rate of FMCl                                         |
| RS05 | HO+HCl=Cl+H <sub>2</sub> O                                                                            | (6.58D-13*EXP(58.0/TEMP)*<br>(TEMP/300.0)**(1.16)) <sup>a</sup> |
| RS06 | O <sub>3</sub> +Cl=CIO{+O <sub>2</sub> }                                                              | (2.3D-11*EXP(-200.0/TEMP))                                      |
| RS07 | CIO+ClO=0.3 Cl <sub>2</sub> +1.4 Cl{+O <sub>2</sub> }                                                 | 1.63D-14                                                        |
| RS08 | NO+ClO=Cl+NO <sub>2</sub>                                                                             | (6.4D-12*EXP(290.0/TEMP))                                       |
| RS09 | CIO+HO <sub>2</sub> =HOCl{+O <sub>2</sub> }                                                           | (2.7D-12*EXP(220.0/TEMP))                                       |
| RS10 | NO <sub>2</sub> +Cl=ClNO <sub>2</sub>                                                                 | K <sub>RS10</sub> <sup>b</sup>                                  |
| RS11 | CH <sub>4</sub> +Cl=HCl+MO <sub>2</sub>                                                               | (6.6D-12*EXP(-1240.0/TEMP))                                     |
| RS12 | ETH+Cl=HCl+0.991 ALD+XO <sub>2</sub> +HO <sub>2</sub>                                                 | (8.3D-11*EXP(-100.0/TEMP))                                      |
| RS13 | HC3+Cl=HCl+XO <sub>2</sub> +0.11 HO <sub>2</sub> +0.11 ALD                                            | 5.0D-11                                                         |
| RS14 | HC5+Cl=HCl+XO <sub>2</sub> +0.11 HO <sub>2</sub> +0.11 ALD                                            | 5.0D-11                                                         |
| RS15 | HC8+Cl=HCl+XO <sub>2</sub> +0.11 HO <sub>2</sub> +0.11 ALD                                            | 5.0D-11                                                         |
| RS16 | ETE+Cl=FMCl+2.0 XO <sub>2</sub> +HO <sub>2</sub> +HCHO                                                | 1.07D-10                                                        |
| RS17 | OLT+Cl=FMCl+ALD+2.0 XO <sub>2</sub> +HO <sub>2</sub>                                                  | 2.5D-10                                                         |
| RS18 | OLI+Cl=0.3 HCl+0.7 FMCl+ALD+0.3 OLT<br>+ 0.1 HC3+0.1 HC5+0.1 HC8+1.7 XO <sub>2</sub> +HO <sub>2</sub> | 3.5D-10                                                         |
| RS19 | ISO+Cl=0.15HCl+XO <sub>2</sub> +HO <sub>2</sub> +0.85FMCl+ISOP                                        | 4.3D-10                                                         |
| RS20 | FMCl+HO=Cl+CO+H <sub>2</sub> O                                                                        | 5.0D-13                                                         |
| RS21 | HCHO+Cl=HCl+HO <sub>2</sub> +CO                                                                       | (8.2D-11*EXP(-34.0/TEMP))                                       |
| RS22 | ALD+Cl=HCl+ACO <sub>3</sub>                                                                           | 1.05D-10                                                        |
| RS23 | TOL+Cl=HCl+XO <sub>2</sub> +0.88 HO <sub>2</sub>                                                      | 6.1D-11                                                         |
| RS24 | XYL+Cl=HCl+XO <sub>2</sub> +0.84 HO <sub>2</sub>                                                      | 1.2D-10                                                         |

<sup>a</sup> TEMP is air temperature.

$${}^b K_{RS10} = \frac{K_0[M]}{\left(1 + \frac{K_0[M]}{K_\infty}\right)} F^Z. K_0 = 1.8 \times 10^{-31} \left(\frac{T}{300}\right)^{-2.0}. K_\infty = 1.0 \times 10^{-10} \left(\frac{T}{300}\right)^{-1.0}. F = 0.6.$$

$$Z = \frac{1.0}{1.0 + \left(\log_{10}\left(\frac{K_0[M]}{K_\infty}\right)\right)^{2.0}}. [M] \text{ is the atmospheric pressure in molecules cm}^{-3}.$$

Environmental monitoring stations in Hong Kong

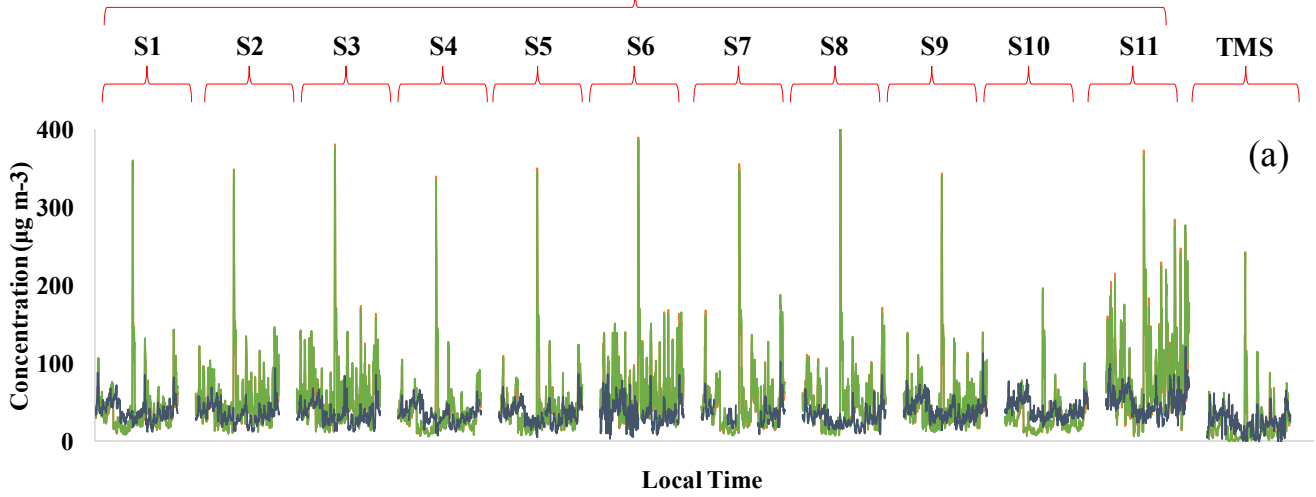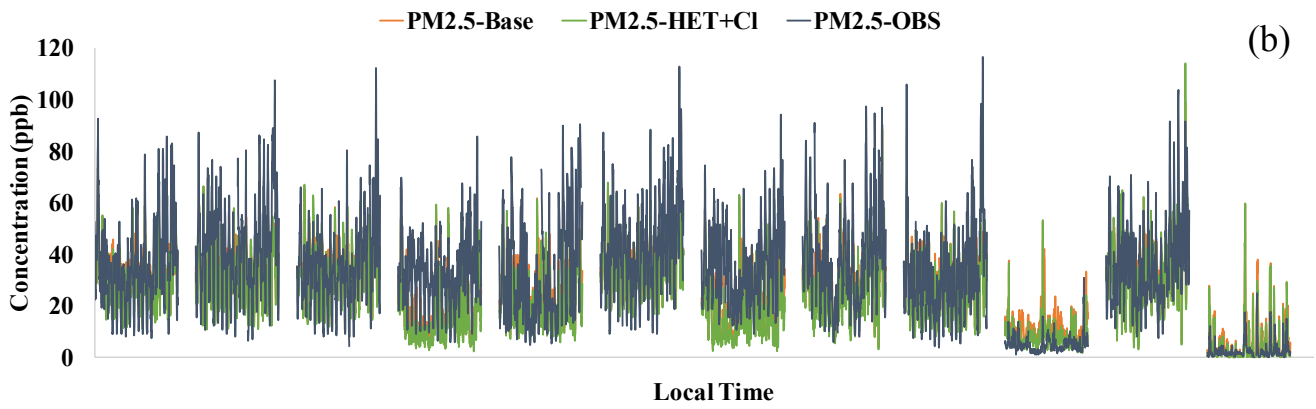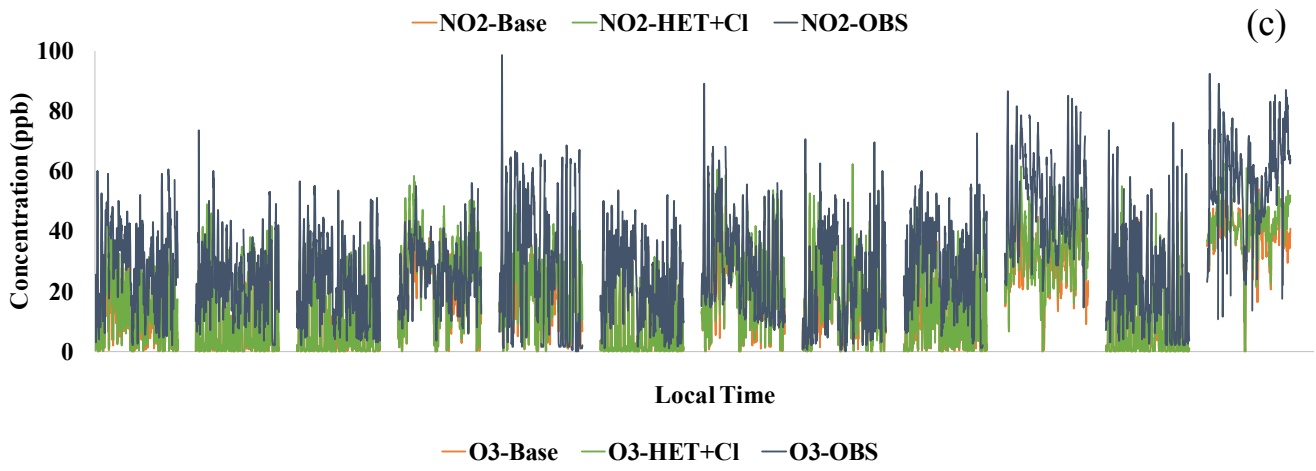

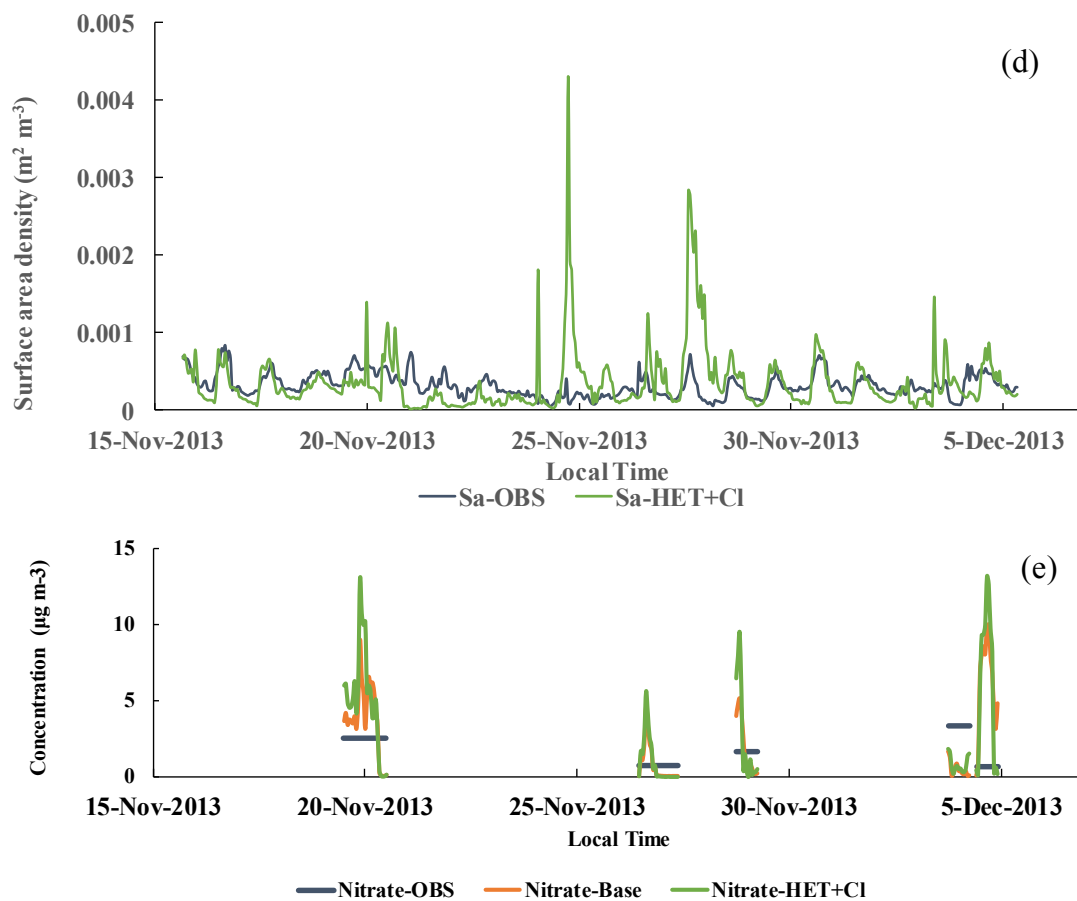

Figure S1. Hourly observed and simulated (Base case and HET+Cl case) (a)  $\text{PM}_{2.5}$ , (b)  $\text{NO}_2$ , and (c)  $\text{O}_3$  concentrations during the entire simulation period at the monitoring stations and at TMS, and (d) surface area density and (e) nitrate concentration at TMS.

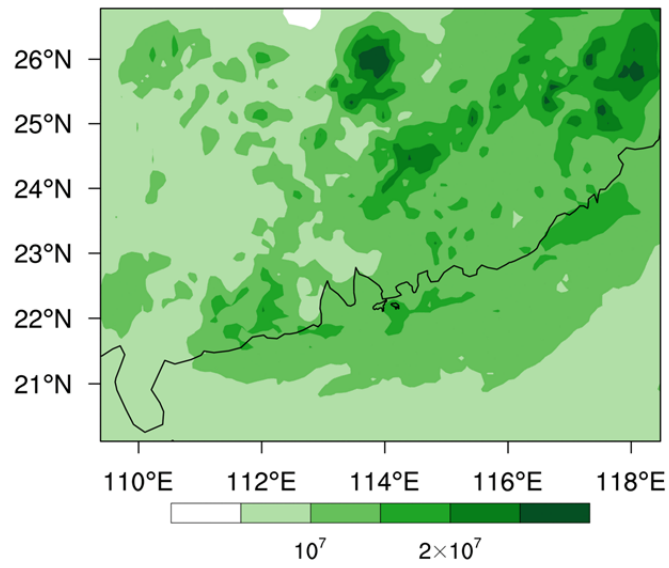

Figure S2. Average simulated ratio of surface area to volume ( $\text{m}^{-1}$ ) for the particles within the PBL

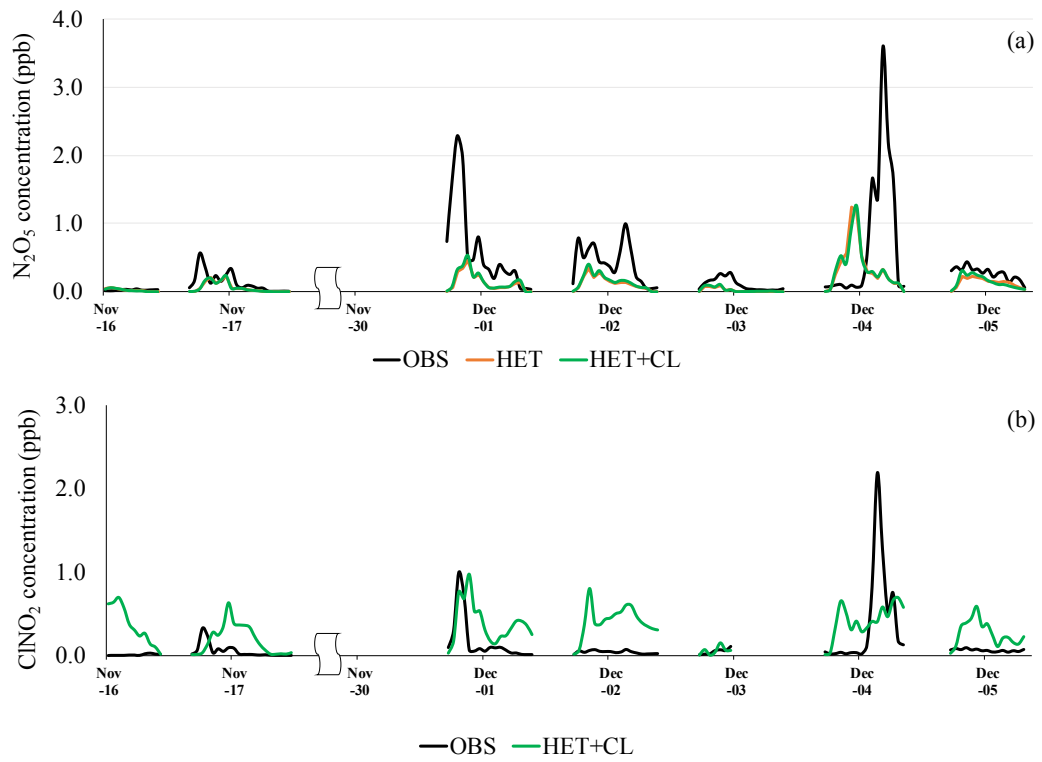

Figure S3. Hourly concentrations of observed and simulated (a)  $\text{N}_2\text{O}_5$  and (b)  $\text{ClNO}_2$  concentrations at TMS site.

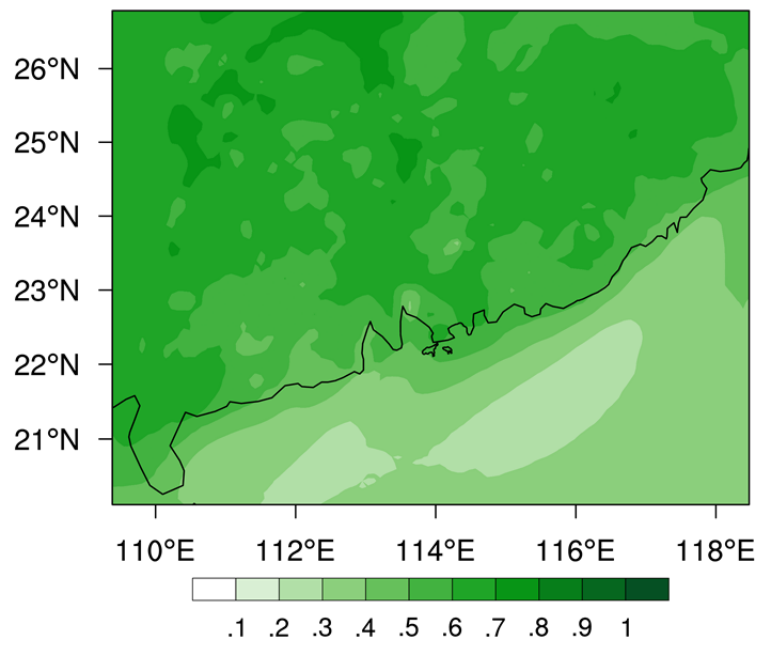

Figure S4. The average simulated yield of ClNO<sub>2</sub> within the PBL during the simulation period.

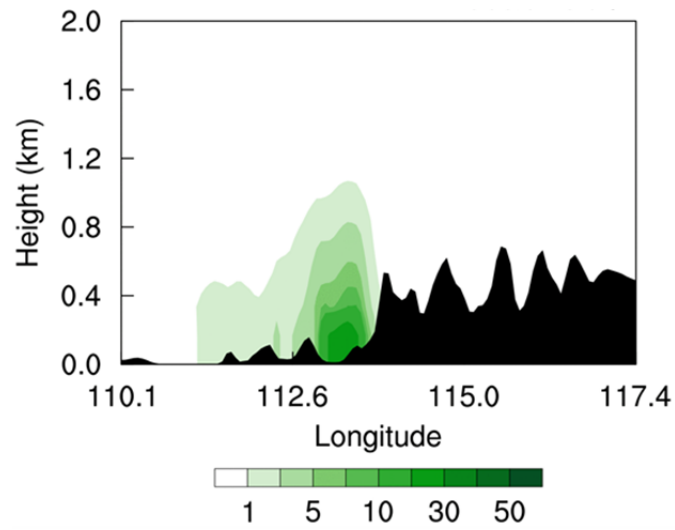

Figure S5. Vertical distributions of NO (ppb) average mixing ratios during the study period in the domain intercepting PRD and along the prevailing wind from Base case

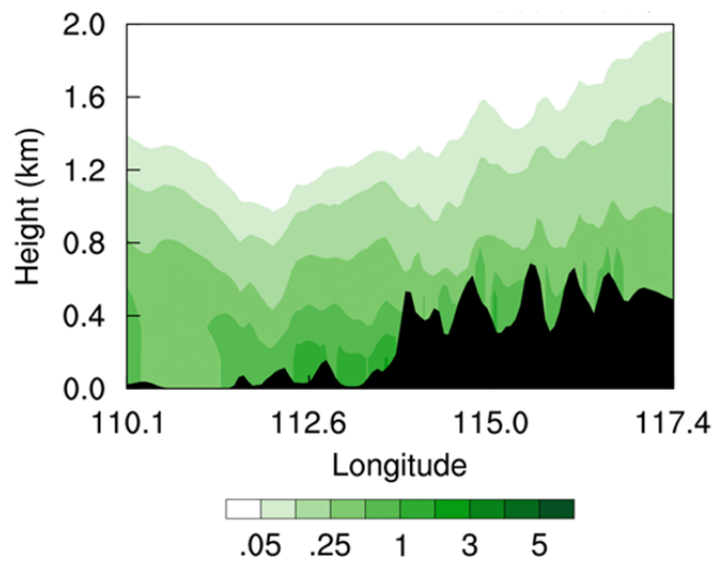

Figure S6. Vertical distributions of chloride ( $\mu\text{g m}^{-3}$ ) average concentrations during the study period in the domain intercepting PRD and along the prevailing wind from Base case

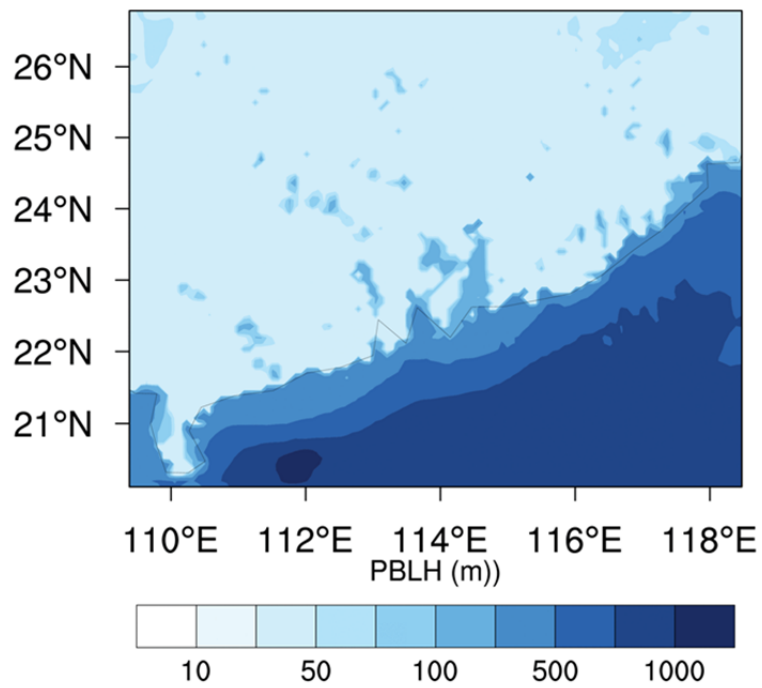

Figure S7. Boundary layer height in southern China at 06:00 Dec 2, LT, as simulated in WRF-Chem

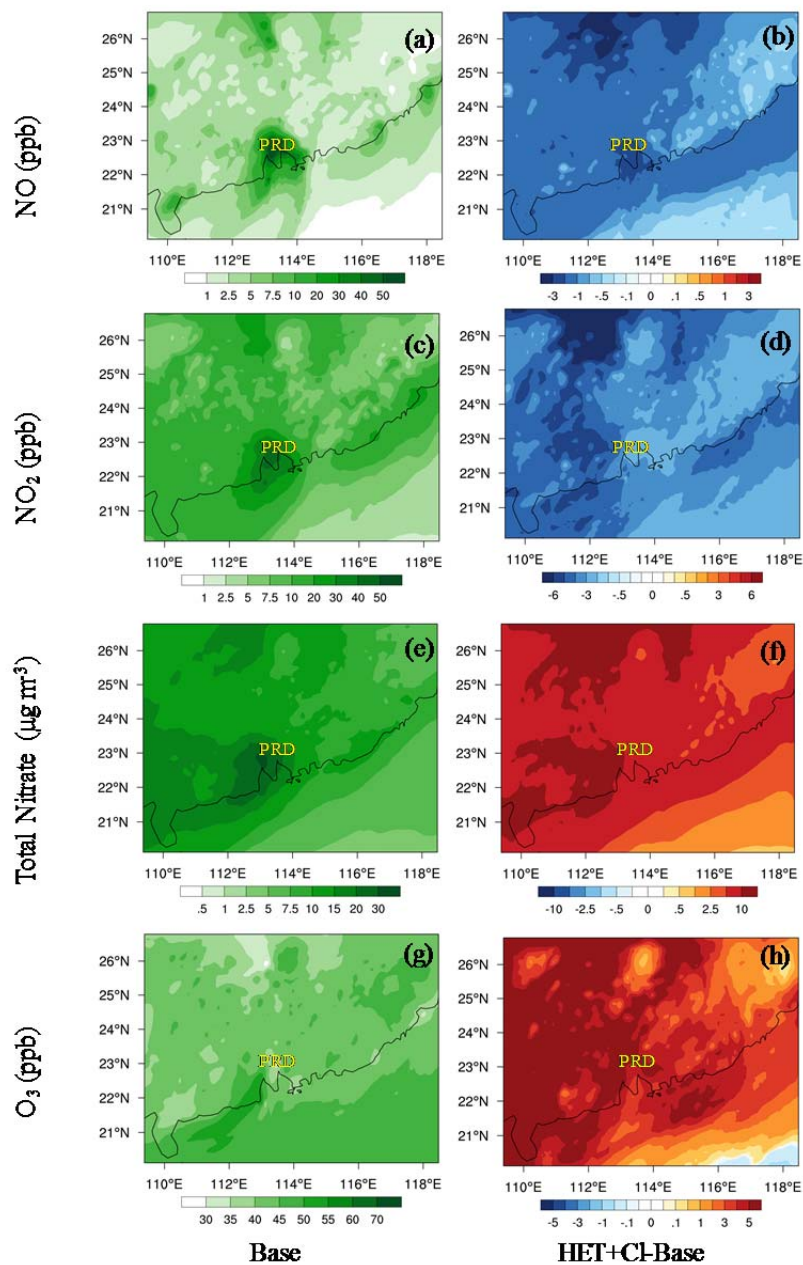

Figure S8. Horizontal distributions of average daily-maximum concentrations of (a) NO (ppb), (c) NO<sub>2</sub> (ppb), (e) total nitrate (μg m<sup>-3</sup>) and (g) O<sub>3</sub> (ppb) during the study period within the PBL from Base case; the average impacts of N<sub>2</sub>O<sub>5</sub> uptake and Cl activation on daily-maximum concentration of (b) NO (ppb), (d) NO<sub>2</sub> (ppb), (f) total nitrate (μg m<sup>-3</sup>) and (h) O<sub>3</sub> (ppb) during the simulation period in the horizontal domain within the PBL.



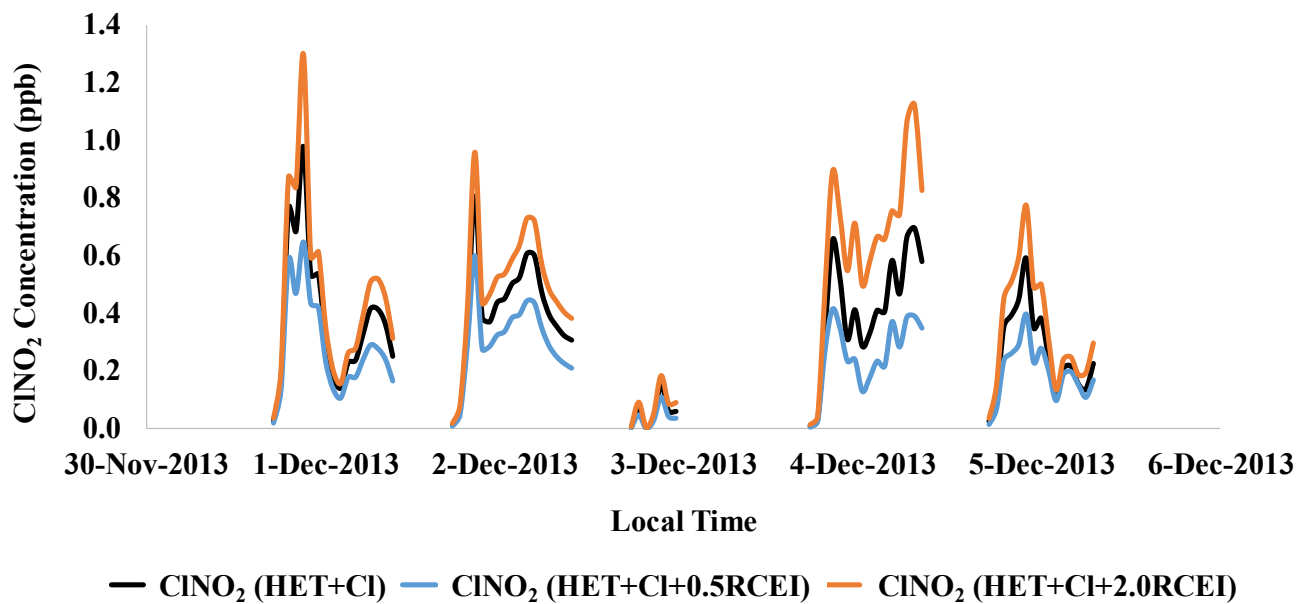

Figure S9. Hourly results of CINO<sub>2</sub> concentrations from simulations with original, half and twice RCEI emission
